# Supplementary material
Source: Springer Nature journal article supplement (https://www.springermedizin.de/resource/supplementary/13058_2012_3168_MOESM16_ESM.pdf/9703426)

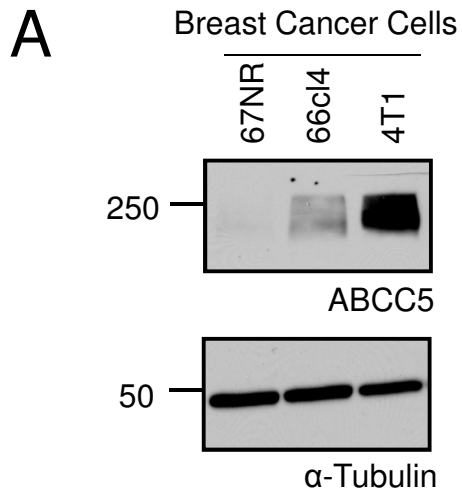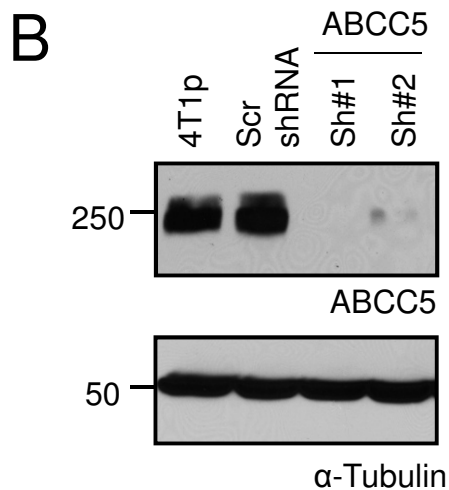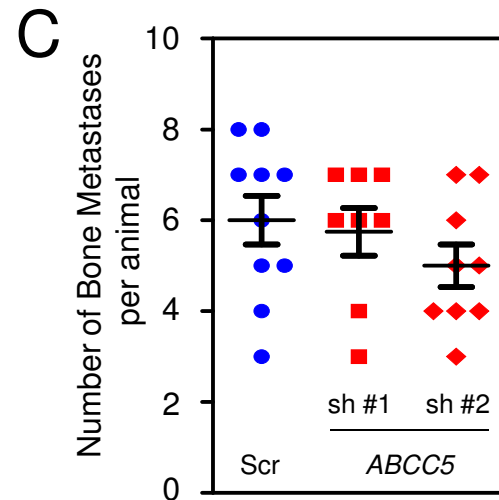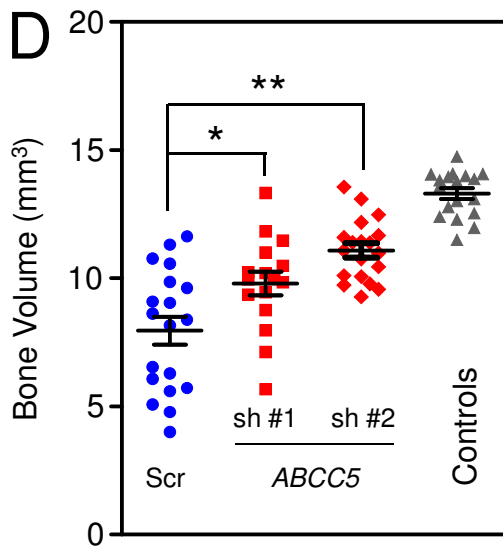

4T1 Breast Cancer Cells -  $\mu$ CT Imaging

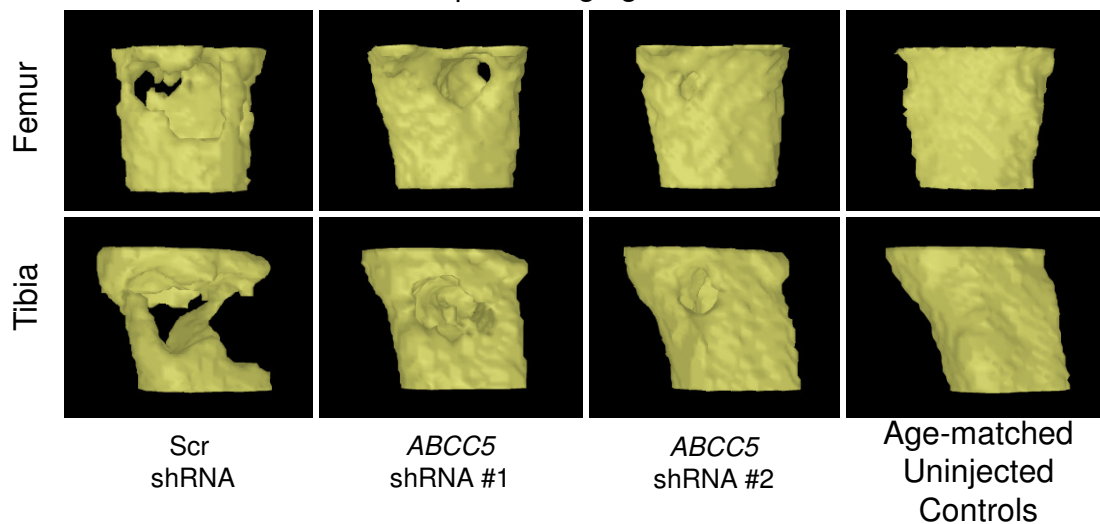

Supplement: MOESM16 [file 9703426]
